# Supplementary material for: A novel red-emitting phosphor K2MgGeO4:Eu3+ for WLEDs: zero-thermal quenching induced by heterovalent substitution
Source: Royal Society of Chemistry journal article supplement (doi:10.1039/d2tc03500f), 2022-01-01
Supplement: d2tc03500f1.pdf [file d2tc03500f1.pdf]

## Electronic Supplementary Information

### A novel red-emitting phosphor $K_2MgGeO_4:Eu^{3+}$ for WLED: zero-thermal quenching induced by heterovalent substitution

Yuxing Bai,<sup>a</sup> Zhenwei Jia,<sup>a</sup> Jingyi Gao,<sup>a</sup> Li Wu,<sup>a</sup> Yongfa Kong,<sup>\*a</sup> Yi Zhang,<sup>b</sup> and Jingjun Xu <sup>a</sup>

<sup>a</sup>Key Laboratory of Weak-Light Nonlinear Photonics, Ministry of Education, School of Physics, Nankai University, Tianjin 300071, China. E-mail: [\\*lwu@nankai.edu.cn](mailto:lwu@nankai.edu.cn)

<sup>b</sup>Institute of Photo-electronic Thin Film Devices and Technology, Nankai University, Tianjin 300071, China

#### Experimental section

**Materials and synthesis:** The samples  $K_{2-x}MgGeO_4:xEu^{3+}$  ( $0.02 \leq x \leq 0.14$ ) were synthesized via a high-temperature solid-state method in an ambient atmosphere. The original raw materials were  $K_2CO_3$  (99.99%),  $MgO$  (99.99%),  $GeO_2$  (99.99%), and  $Eu_2O_3$  (99.99%). All of them were weighted according to the molar ratio and thoroughly mixed in an agate mortar. Then the processed mixtures were pre-heated at 600 °C for 12 h in a crucible to decompose the carbonates and eliminate water. After cooling to room temperature, the pre-sintered samples were reground and sintered at 1100 °C for 24 h. Finally, the sintered products were well ground into powders to use in subsequent performance characterizations.

**Characterization:** Powder XRD patterns were collected on a D8 ADVANCE diffractometer (X'Pert Pro, PANalytical B.V., Netherlands) operating at 40 kV and 40 mA with Cu  $K\alpha$  radiation ( $\lambda = 1.5406 \text{ \AA}$ ). The refinement data for Rietveld analysis were gathered in step-scanning mode over the  $2\theta$  range from 10° to 130° at intervals of 0.017°. The photoluminescence (PL) and photoluminescence excitation (PLE) spectra at room temperature were measured using a fluorescence spectrometer (Edinburgh Instruments, FLS920, England) equipped with a 150 W Xenon lamp. The photoluminescence quantum yield (PLQY) was measured using a calibrated integrating sphere. The fluorescence lifetime of millisecond was obtained using a 100 w  $\mu F900$  lamp as the light source and a R928P photo-multiplier as the detector. The temperature-dependent luminescence properties were also studied using the same spectrofluorometer with a heating apparatus (Tianjin Orient Koji Co., Ltd, TAP-02). Scanning electron microscopy (SEM, SU8020, HITACHI, Japan) with energy dispersive X-ray spectroscopy (EDX, EMAX, HORIBA) was used to characterize the morphology of the samples. X-ray photoelectron spectroscopy (XPS) were recorded using a Thermo Scientific ESCALAB 250Xi (America) and calibrated to a C 1s electron peak at 284.8 eV. Inductively Coupled Plasma-Optical Emission Spectrometer (ICP-OES) was considered to examine the amounts of all the elements by means of Agilent ICPOES730 (America) with the power of 1.0 KW. After pre-irradiating with 365 nm UV light for 15 min, thermoluminescence (TL) curves of the powder samples were obtained using a thermoluminescence meter (FJ427A1, CNCS, China). The CIE coordinate ( $x, y$ ) was calculated from the emission spectra through the CIE calculator. Based on that, the CCT (K) values were approximated by the following equation:<sup>1</sup>

$$CCT = -437 \times n^3 + 3601 \times n^2 - 6861 \times n + 5541.31 \quad (1)$$

where  $n$  is  $(x-x_c)/(y-y_c)$  and  $(x_c = 0.3320, y_c = 0.1858)$  is the chromaticity epicenter. The color purity can be calculated via using the obtained CIE coordinates, as expressed by the following equation:<sup>2</sup>

$$Color\ purity\ (\%) = \frac{\sqrt{(x_s - x_i)^2 + (y_s - y_i)^2}}{\sqrt{(x_d - x_i)^2 + (y_d - y_i)^2}} \quad (2)$$

where  $(x_s, y_s)$ ,  $(x_d, y_d)$ , and  $(x_i = 0.33, y_i = 0.33)$  are the CIE coordinates of the as-prepared phosphors, the dominant

wavelength, and the reference white illuminant point, respectively.

**Computational methods:** All the DFT calculations were implemented with the Vienna ab initio simulation package (VASP). The electron-ion interactions were determined using the projector augmented wave pseudo-potential method.<sup>3</sup> Periodic DFT calculations were performed using the PBE+U approach with  $U = 2.5$  eV for the Eu 4f electrons. K ( $4s^1$ ), Mg ( $3s^2$ ), Ge ( $3d^{10}4s^24p^2$ ), O ( $2s^22p^4$ ), and Eu ( $5s^25p^64f^76s^2$ ) electrons were treated as their own valence electrons. To investigate the density of states accurately, the spin-polarized generalized gradient approximation with the Perdew-Burke-Ernzerhof functional was adopted to describe the electronic exchange-correlation potential.<sup>4</sup> The cutoff energy of 400 eV was used for the plane-wave basis set to expand the pseudo valence wave function. A  $2 \times 2 \times 1$  supercell was constructed, in which  $K^+$  ions were substituted by  $Eu^{3+}$  ions. Moreover, k-point grids for the Brillouin zone were generated with  $5 \times 5 \times 5$  and  $1 \times 1 \times 1$  G-centered models for the primitive-cell and super-cell, respectively. All the optimization processes were considered to satisfy the convergence criterion when the total energy change was less than  $1 \times 10^{-4}$  eV per step, and the maximum force was less than  $3 \times 10^{-2}$  eV  $\text{\AA}^{-1}$  per atom.

**LED fabrication:** The WLED was successfully fabricated through combining commercial blue phosphor  $BaMgAl_{10}O_{17}:Eu^{2+}$ , green phosphor  $(Sr, Ba)_2SiO_4:Eu^{2+}$  and our red phosphor  $K_{1.9}MgGeO_4:0.10Eu^{3+}$  with a UV-LED chip ( $\lambda = 394$  nm). The phosphors were thoroughly mixed with epoxy resin, and the obtained phosphor-epoxy resin mixture was coated on the LED chip. The photoelectric properties, including the electroluminescent (EL) spectrum, luminous efficacy, CCT, color rendering index ( $R_a$ ) as well as CIE color coordinates of the LED were characterized by using a photometry colorimeter & electricity test system equipped with an integrating sphere (HP9000, Hopoo, China).

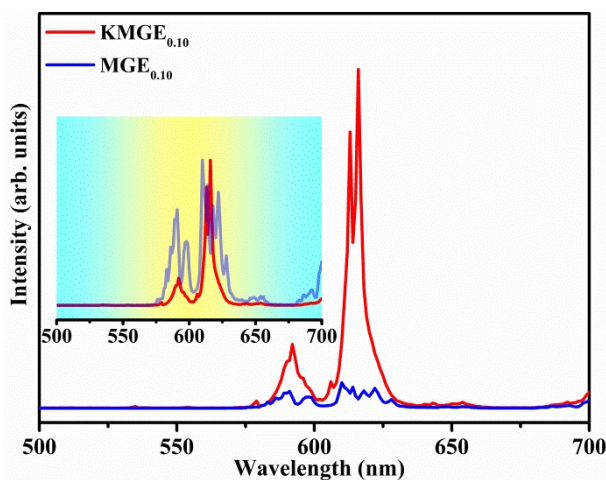

**Fig. S1** PL spectra of  $K_{1.9}MgGeO_4:0.10Eu^{3+}$  and  $MgGeO_3:0.10Eu^{3+}$  ( $\lambda_{ex} = 394$  nm,  $\lambda_{em} = 616$  nm).

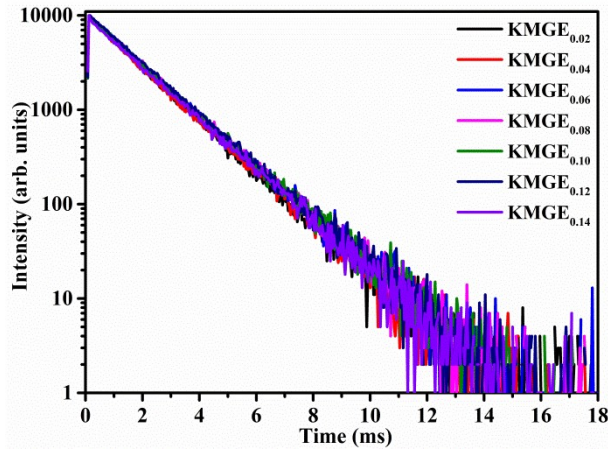

Fig. S2 Decay curves of  $K_{2-x}MgGeO_4:xEu^{3+}$  ( $0.02 \leq x \leq 0.14$ ,  $\lambda_{ex} = 394$  nm,  $\lambda_{em} = 616$  nm).

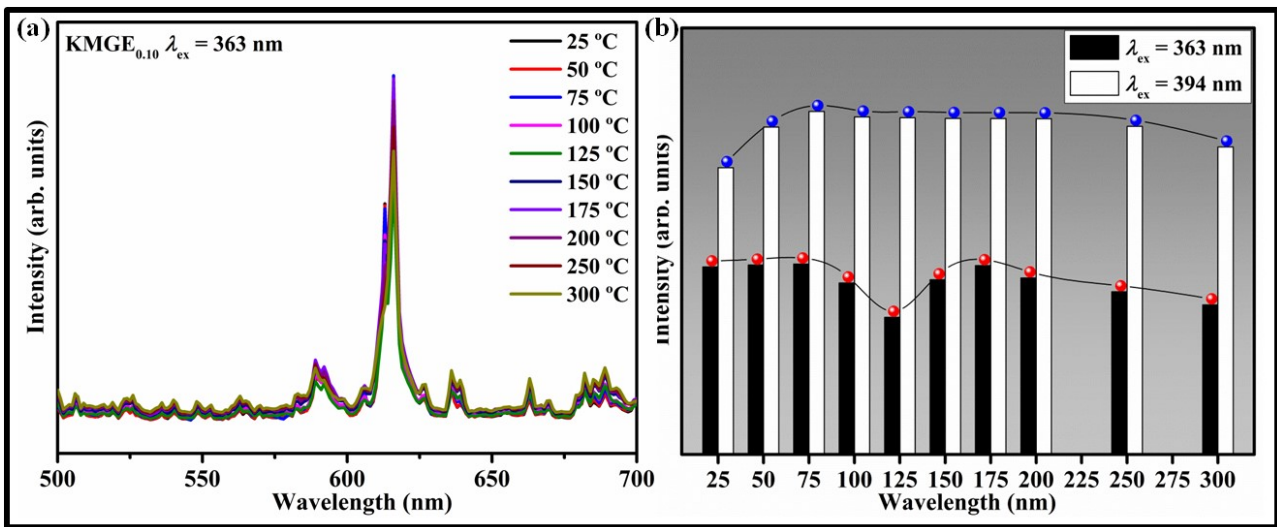

Fig. S3 (a) Temperature-dependent spectrum of  $K_{1.9}MgGeO_4:0.10Eu^{3+}$  ( $\lambda_{ex} = 363$  nm,  $\lambda_{em} = 616$  nm). (b) The relationship between temperature and emission intensity ( $\lambda_{ex} = 363$  nm, 394 nm;  $\lambda_{em} = 616$  nm).

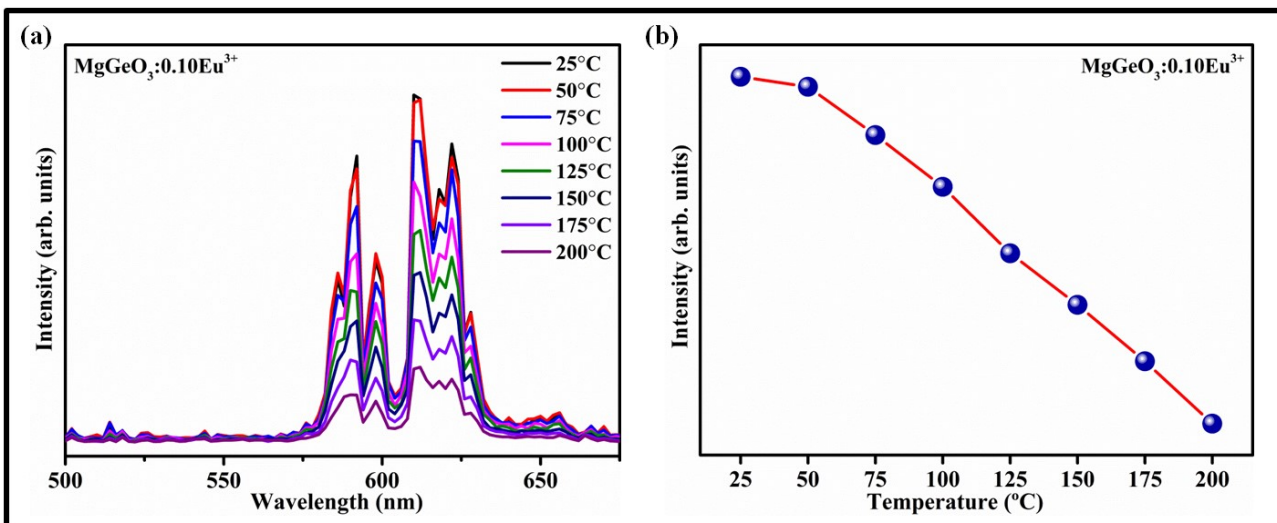

Fig. S4 (a) Temperature-dependent spectrum of  $MgGeO_3:0.10Eu^{3+}$  ( $\lambda_{ex} = 394$  nm,  $\lambda_{em} = 616$  nm). (b) The relationship between temperature and emission intensity ( $\lambda_{ex} = 394$  nm,  $\lambda_{em} = 616$  nm).

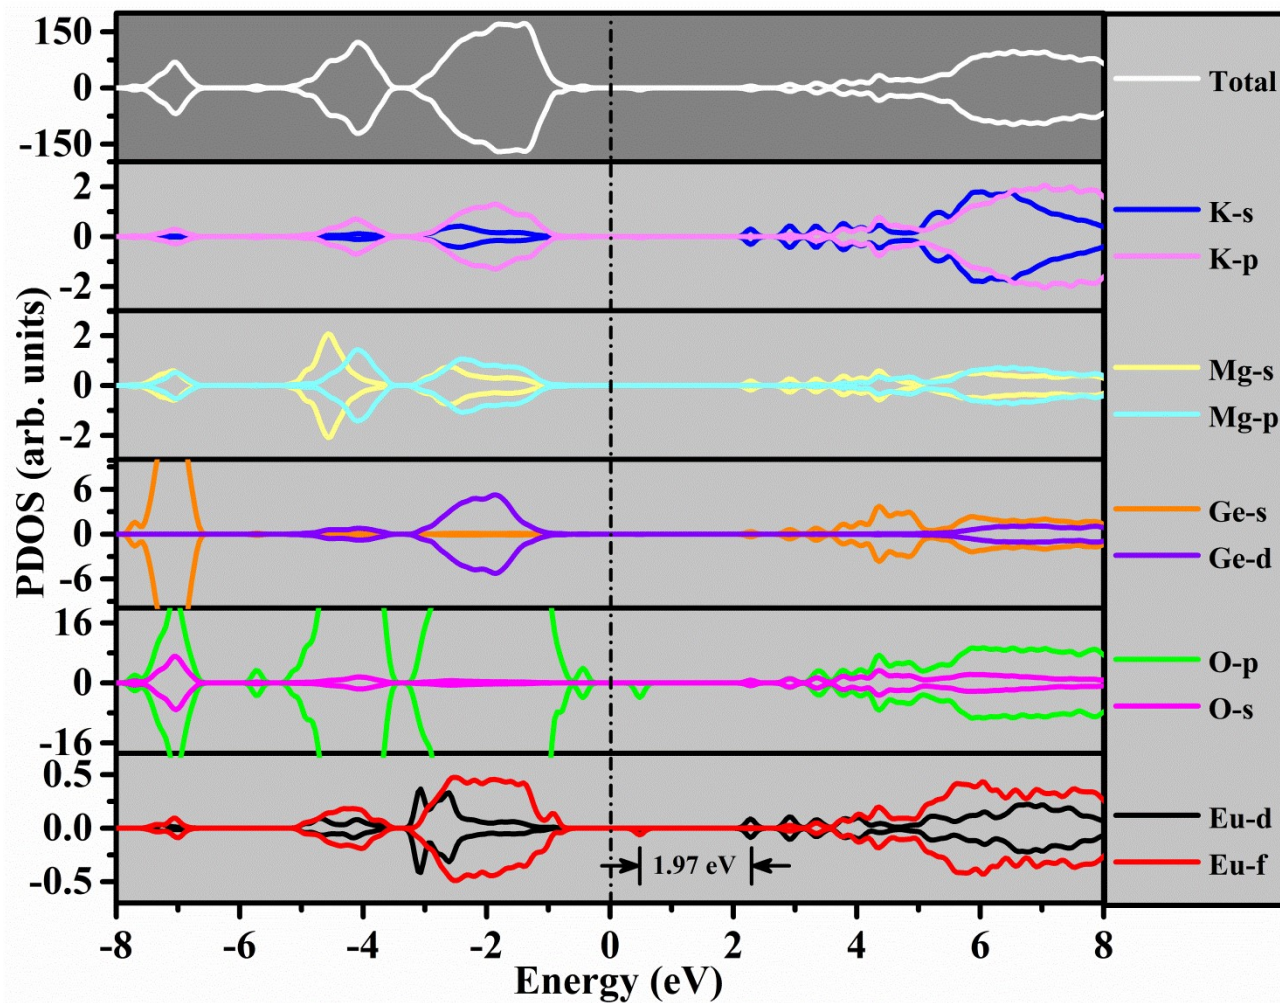

Fig. S5 Total and partial density of states for  $K_{1.9}MgGeO_4:0.10Eu^{3+}$ .



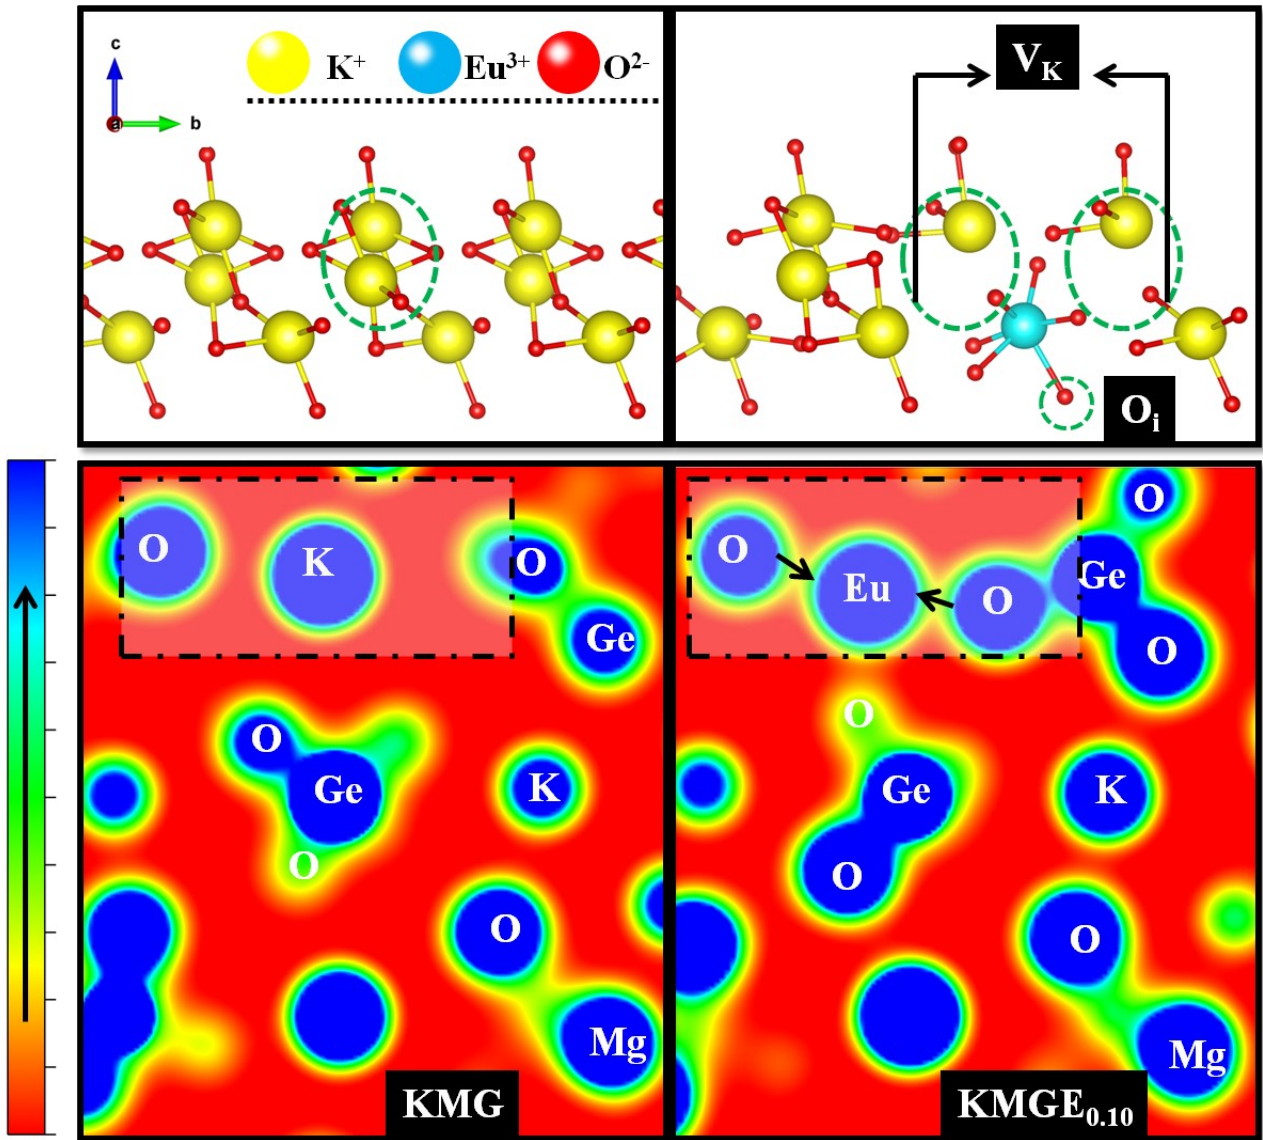

**Fig. S6** Local coordinated structures and two-dimensional electron localization function (ELF) maps around K/Eu sites for  $K_2MgGeO_4$  and  $K_{1.9}MgGeO_4:0.10Eu^{3+}+V_K+O_i$ .

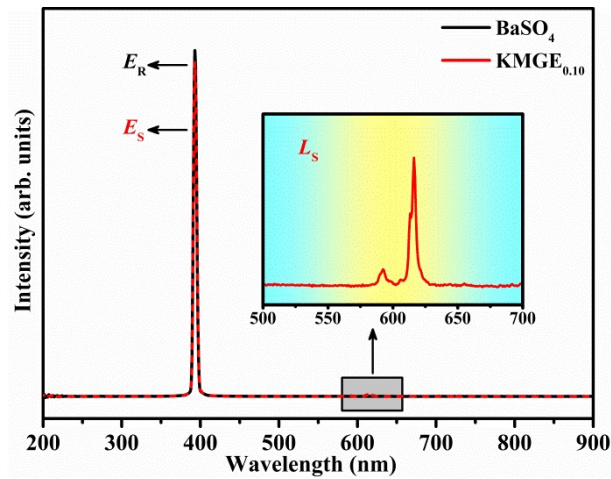

**Fig. S7** The excitation line of BaSO<sub>4</sub> and the emission spectrum of the K<sub>1.9</sub>MgGeO<sub>4</sub>:0.10Eu<sup>3+</sup> phosphors collected using an integrating sphere. The inset shows a magnification of the emission spectrum.

As shown in Fig. S6, the internal quantum efficiency (IQE) value can be calculated by the following equation:<sup>5</sup>

$$\eta_{QE} = \frac{\int L_S}{\int E_R - \int E_S} \quad (3)$$

where  $E_R$  is the spectrum of the excitation light without the sample in the sphere,  $E_S$  is the spectrum of the light used for exciting the sample, and  $L_S$  is the emission spectrum of the targeted sample.

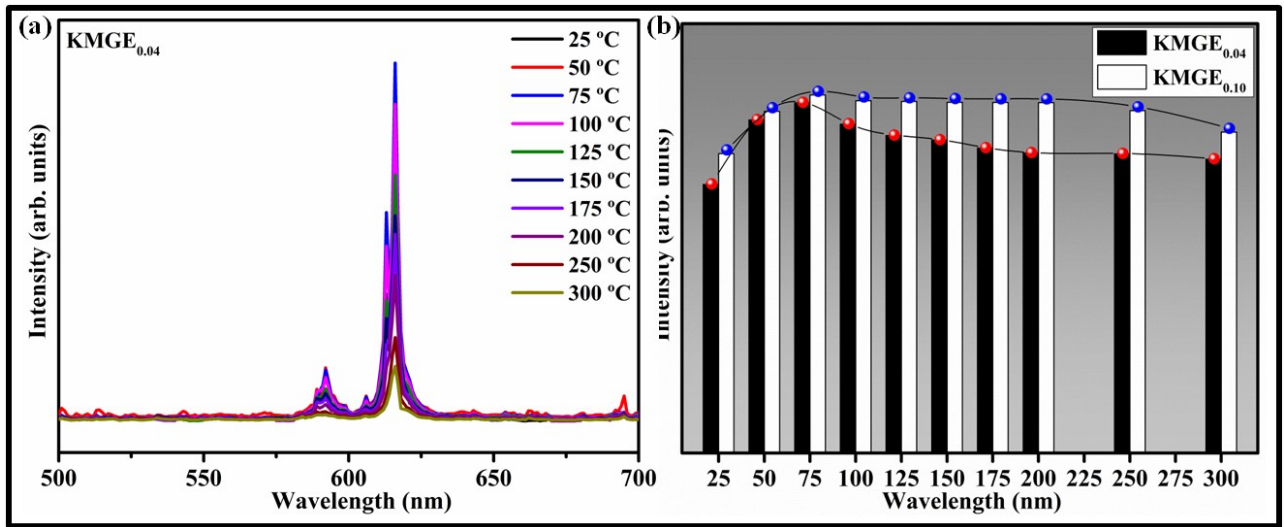

**Fig. S8** (a) Temperature-dependent spectrum of K<sub>1.96</sub>MgGeO<sub>4</sub>:0.04Eu<sup>3+</sup> ( $\lambda_{ex} = 394$  nm,  $\lambda_{em} = 616$  nm). (b) The relationship between temperature and emission intensity of K<sub>1.96</sub>MgGeO<sub>4</sub>:0.04Eu<sup>3+</sup> and K<sub>1.9</sub>MgGeO<sub>4</sub>:0.10Eu<sup>3+</sup> ( $\lambda_{ex} = 394$  nm,  $\lambda_{em} = 616$  nm).

**Table S1** Lattice parameters and agreement factors for K<sub>2</sub>MgGeO<sub>4</sub>:0.01Eu<sup>3+</sup> refined by Rietveld method when Eu<sup>3+</sup> ions occupy all of the cationic sites.

|                            |                                |
|----------------------------|--------------------------------|
| Crystal system             | orthorhombic                   |
| Space group                | <i>Pca</i> 2 <sub>1</sub> (29) |
| <i>a</i> (Å)               | 11.1886 (3)                    |
| <i>b</i> (Å)               | 5.5724 (11)                    |
| <i>c</i> (Å)               | 15.8387 (3)                    |
| Volume (Å <sup>3</sup> )   | 987.50 (4)                     |
| <i>Z</i>                   | 8                              |
| <i>R<sub>p</sub></i> (%)   | 10.04                          |
| <i>R<sub>wp</sub></i> (%)  | 14.86                          |
| <i>R<sub>exp</sub></i> (%) | 8.32                           |
| GOF                        | 1.79                           |

**Table S2** Atomic positions and occupancies for K<sub>2</sub>MgGeO<sub>4</sub>:0.01Eu<sup>3+</sup> refined by Rietveld method when Eu<sup>3+</sup> ions occupy all of the cationic sites.

| Np | <i>x</i> | <i>y</i> | <i>z</i> | Occupancy |
|----|----------|----------|----------|-----------|
|----|----------|----------|----------|-----------|

|     |   |                |             |            |            |
|-----|---|----------------|-------------|------------|------------|
| K1  | 4 | 0.0047 (3)     | -0.0097 (3) | 0.7824 (8) | 1.059 (5)  |
| Eu1 | 4 | 0.0047 (3)     | -0.0097 (3) | 0.7824 (8) | -0.059 (5) |
| K2  | 4 | 0.0115 (2)     | 0.5327 (3)  | 0.4013 (5) | 1.057 (6)  |
| Eu2 | 4 | 0.0115 (2)     | 0.5327 (3)  | 0.4013 (5) | -0.057 (6) |
| K3  | 4 | 0.2261 (2)     | 0.0404 (3)  | 0.1566 (9) | 1.056 (5)  |
| Eu3 | 4 | 0.2261 (2)     | 0.0404 (3)  | 0.1566 (9) | -0.056 (5) |
| K4  | 4 | 0.2446 (9)     | 0.5632 (2)  | 0.9927 (8) | 0.9919 (2) |
| Eu4 | 4 | 0.2446 (9)     | 0.5632 (2)  | 0.9927 (8) | 0.0081 (2) |
| Mg1 | 4 | 0.0099 (3)     | -0.0267 (6) | 0.5258 (9) | 1.083 (7)  |
| Eu5 | 4 | 0.0099 (3)     | -0.0267 (6) | 0.5258 (9) | -0.083 (7) |
| Mg2 | 4 | 0.2397 (3)     | 0.5179 (3)  | 0.2740 (2) | 1.0 (4)    |
| Eu6 | 4 | 0.2397 (3)     | 0.5179 (3)  | 0.2740 (2) | 0.0 (4)    |
| Ge1 | 4 | 0.0057 (9)     | 0.4924 (12) | 0.6434 (5) | 1.032 (4)  |
| Eu7 | 4 | 0.0057 (9)     | 0.4924 (12) | 0.6434 (5) | -0.032 (4) |
| Ge2 | 4 | 0.2339<br>(11) | 0.0339 (5)  | 0.8967 (8) | 1.001 (4)  |
| Eu8 | 4 | 0.2339<br>(11) | 0.0339 (5)  | 0.8967 (8) | -0.001 (4) |
| O1  | 4 | -0.0070 (3)    | 0.9328 (6)  | 0.0520 (2) | 1.0        |
| O2  | 4 | 0.0325 (3)     | 0.3362 (6)  | 0.0415 (8) | 1.0        |
| O3  | 4 | 0.0873 (3)     | 0.3989 (7)  | 0.2063 (9) | 1.0        |
| O4  | 4 | 0.1180 (4)     | 0.8781 (9)  | 0.9212 (9) | 1.0        |
| O5  | 4 | 0.1539 (5)     | 0.5660 (9)  | 0.6631 (7) | 1.0        |
| O6  | 4 | 0.1522 (3)     | 0.1098 (6)  | 0.4688 (3) | 1.0        |
| O7  | 4 | 0.2099 (2)     | 0.2901 (6)  | 0.8371 (8) | 1.0        |
| O8  | 4 | 0.2053 (3)     | 0.8413 (6)  | 0.3151 (5) | 1.0        |

**Table S3** Lattice parameters and agreement factors for  $K_{1.99}MgGeO_4:0.01Eu^{3+}$  refined by Rietveld method when  $Eu^{3+}$  ions occupy the K(4) site.

|                          |               |
|--------------------------|---------------|
| Crystal system           | orthorhombic  |
| Space group              | $Pca2_1$ (29) |
| $a$ (Å)                  | 11.1883 (3)   |
| $b$ (Å)                  | 5.5729 (2)    |
| $c$ (Å)                  | 15.8434 (4)   |
| Volume (Å <sup>3</sup> ) | 987.86 (5)    |
| $Z$                      | 8             |
| $R_p$ (%)                | 9.94          |
| $R_{wp}$ (%)             | 14.76         |
| $R_{exp}$ (%)            | 8.32          |
| GOF                      | 1.77          |

**Table S4** Atomic positions and occupancies for  $K_{1.99}MgGeO_4:0.01Eu^{3+}$  refined by Rietveld method when  $Eu^{3+}$  ions occupy the K(4) site.

|     | Np | <i>x</i>       | <i>y</i>    | <i>z</i>   | Occupancy  |
|-----|----|----------------|-------------|------------|------------|
| K1  | 4  | 0.0081 (2)     | 0.0105 (3)  | 0.7547 (7) | 0.8953 (4) |
| K2  | 4  | 0.0110 (9)     | 0.4866 (3)  | 0.3760 (9) | 0.9335 (3) |
| K3  | 4  | 0.2364 (2)     | 0.0316 (3)  | 0.1299 (9) | 0.9449 (3) |
| K4  | 4  | 0.2409 (9)     | 0.5524 (2)  | 0.9924 (8) | 0.9902 (6) |
| Eu  | 4  | 0.2409 (9)     | 0.5524 (2)  | 0.9924 (8) | 0.0098 (6) |
| Mg1 | 4  | 0.0105 (2)     | 0.0070 (4)  | 0.5031 (2) | 1.0        |
| Mg2 | 4  | 0.2476 (3)     | 0.5308 (3)  | 0.2809 (2) | 1.0        |
| Ge1 | 4  | 0.0073<br>(11) | 0.5101 (9)  | 0.6206 (4) | 1.0        |
| Ge2 | 4  | 0.2354 (8)     | 0.0288 (12) | 0.8753 (5) | 1.0        |
| O1  | 4  | 0.0096 (3)     | 0.7994 (6)  | 0.0912 (2) | 1.0        |
| O2  | 4  | 0.0429 (3)     | 0.3044 (6)  | 0.0190 (3) | 1.0        |
| O3  | 4  | 0.0909 (2)     | 0.3863 (5)  | 0.1943 (2) | 1.0        |
| O4  | 4  | 0.0763 (4)     | 0.9027 (9)  | 0.8896 (2) | 1.0        |
| O5  | 4  | 0.1602 (5)     | 0.6035 (8)  | 0.6486 (3) | 1.0        |
| O6  | 4  | 0.1670 (3)     | 0.0613 (6)  | 0.4612 (2) | 1.0        |
| O7  | 4  | 0.2117 (3)     | 0.2847 (7)  | 0.8233 (3) | 1.0        |
| O8  | 4  | 0.2078 (3)     | 0.8368 (5)  | 0.2980 (2) | 1.0        |

**Table S5** The fitted lifetimes of  $K_{2-x}MgGeO_4:xEu^{3+}$  ( $0.02 \leq x \leq 0.14$ ).

| Doped concentrations | $\tau$ | $\chi^2$ |
|----------------------|--------|----------|
| 0.02                 | 1.505  | 2.150    |
| 0.04                 | 1.534  | 2.304    |
| 0.06                 | 1.602  | 1.871    |
| 0.08                 | 1.606  | 1.637    |
| 0.10                 | 1.614  | 1.654    |
| 0.12                 | 1.610  | 1.844    |
| 0.14                 | 1.590  | 2.127    |

**Table S6** The CIE chromaticity coordinates, CCT, ( ${}^5D_0 \rightarrow {}^7F_2$ )/( ${}^5D_0 \rightarrow {}^7F_1$ ), and color purity of  $K_{2-x}MgGeO_4:xEu^{3+}$  ( $0.06 \leq x \leq 0.14$ ).

| Doped concentrations (mol) | CIE coordinates ( <i>x</i> , <i>y</i> ) | CCK (K) | ( ${}^5D_0 \rightarrow {}^7F_2$ )/( ${}^5D_0 \rightarrow {}^7F_1$ ) | Color purity (%) |
|----------------------------|-----------------------------------------|---------|---------------------------------------------------------------------|------------------|
| <i>x</i> = 0.06            | (0.6641, 0.3356)                        | 3268    | 6.10                                                                | 99.50            |
| <i>x</i> = 0.08            | (0.6641, 0.3356)                        | 3269    | 6.17                                                                | 99.50            |
| <i>x</i> = 0.10            | (0.6642, 0.3355)                        | 3272    | 6.21                                                                | 99.53            |
| <i>x</i> = 0.12            | (0.6609, 0.3387)                        | 3095    | 5.15                                                                | 99.51            |
| <i>x</i> = 0.14            | (0.6606, 0.3390)                        | 3080    | 5.07                                                                | 99.51            |

**Table S7** The amounts of all the elements through ICP-OES analysis for  $K_{1.9}MgGeO_4:0.10Eu^{3+}$ .

| Sample               | Wt%          | Elements |      |       |       |      |
|----------------------|--------------|----------|------|-------|-------|------|
|                      |              | K        | Mg   | Ge    | O     | Eu   |
| KMGE <sub>0.10</sub> | Theoretical  | 27.34    | 9.90 | 30.10 | 26.39 | 6.27 |
|                      | Experimental | 25.10    | 9.16 | 28.87 | 30.98 | 5.89 |



**Table S8** The total free energies of  $K_2MgGeO_4$  and  $K_{1.9}MgGeO_4:0.10Eu^{3+}$  when  $Eu^{3+}$  ions occupy different cationic sites.

| Samples           | KMG           | KMGE <sub>0.10</sub> |           |           |           |           |           |
|-------------------|---------------|----------------------|-----------|-----------|-----------|-----------|-----------|
|                   |               | Eu-K1                | Eu-K2     | Eu-K3     | Eu-K4     | Eu-Mg1    | Eu-Mg2    |
| Total energy (eV) | -<br>1411.263 | -1419.332            | -1419.371 | -1419.351 | -1419.455 | -1416.833 | -1416.643 |

**Table S9** The total free energies and defect formation energies of  $K_{1.9}MgGeO_4:0.10Eu^{3+}$  when the lattice has different kinds of defects.

| Sample                       | KMGE <sub>0.10</sub> |                |                              |
|------------------------------|----------------------|----------------|------------------------------|
|                              | Without defects      | With defects   |                              |
|                              |                      | V <sub>K</sub> | V <sub>K+O<sub>i</sub></sub> |
| Total energy (eV)            | -1419.455            | -1403.201      | -1428.195                    |
| Defect formation energy (eV) | -                    | 5.85           | -3.45                        |

**Table S10** The CCT,  $R_a$ , and CIE chromaticity coordinates under different currents (20-300 mA) for the fabricated WLED.

| Current (mA) | CIE (x, y)       | CCT  | $R_a$ |
|--------------|------------------|------|-------|
| 20           | (0.3084, 0.3402) | 6648 | 91.7  |
| 40           | (0.3008, 0.3395) | 7050 | 92.9  |
| 60           | (0.3066, 0.3363) | 6770 | 91.1  |
| 80           | (0.3024, 0.3357) | 7006 | 88.9  |
| 100          | (0.3050, 0.3339) | 6884 | 90.9  |
| 120          | (0.3036, 0.3335) | 6960 | 91.1  |
| 140          | (0.3036, 0.3323) | 6976 | 90.9  |
| 160          | (0.3029, 0.3313) | 7027 | 90.8  |
| 180          | (0.3010, 0.3308) | 7144 | 90.9  |
| 200          | (0.3012, 0.3395) | 7148 | 90.6  |
| 220          | (0.3005, 0.3285) | 7201 | 90.7  |
| 240          | (0.2995, 0.3273) | 7276 | 90.3  |
| 260          | (0.2984, 0.3261) | 7361 | 90.3  |
| 280          | (0.2972, 0.3252) | 7451 | 90.7  |
| 300          | (0.2962, 0.3249) | 7515 | 90.8  |

## Notes and references

- 1 D. A. Hakeem, D. H. Kim, S. W. Kim, and K. Park, *Dyes Pigm.*, 2019, **163**, 715-724.
- 2 Y. Li, C. D. Gong, C. G. Li, K. P. Ruan, C. Liu, H. Liu, and J. W. Gu, *J. Mater. Sci. Technol.*, 2021, **82**, 250-256.
- 3 B. Y. Qu, B. Zhang, L. Wang, R. L. Zhou, and X. C. Zeng, *Chem. Mater.*, 2015, **27**, 2195-2202.
- 4 J. P. Perdew, W. T. Yang, K. Burke, and A. Görling, *P. NATL. ACAD. SCI.*, 2017, **114**, 2801-2806.
- 5 Y. J. Liu, G. X. Zhang, J. B. Huang, X. M. Tao, G. H. Li, and G. M. Cai, *Inorg. Chem.*, 2021, **60**, 2279-2293.
